# Supplementary material for: Co-delivery of a CD4 T cell helper epitope via covalent liposome attachment with a surface-arrayed B cell target antigen fosters higher affinity antibody responses
Source: PubMed Central journal article supplement (PMC6192012; doi:10.1016/j.vaccine.2018.08.014), 2018-10-01
Supplement: mmc1.pdf [file mmc1.pdf]

**Table S1. 4E10 B cells staining exp.:**

| <b>mAb</b>                                       | <b>Clone</b> | <b>Catalog #</b> | <b>company</b>           |
|--------------------------------------------------|--------------|------------------|--------------------------|
| Fc block Anti-Mouse CD16/CD32                    | 2.4G2 (RUO)  | 553142           | BD Biosciences           |
| Anti-Human Ig $\kappa$ mAb, PE                   | TB28-2       | 12-9970-42       | eBioscience              |
| LACK1:I-A <sup>d</sup> biotin                    | 2C44         | ---              | Made in house            |
| Streptavidin, Alexa Fluor™ 647 Conjugate, AF 647 | ---          | S32357           | Thermo Fisher Scientific |
| DAPI                                             | ---          | D9542            | Sigma-Aldrich            |

**Table S2. GC B cells:**

| <b>mAb</b>                                | <b>Clone</b>  | <b>Catalog #</b> | <b>company</b>           |
|-------------------------------------------|---------------|------------------|--------------------------|
| Fixable Viability Dye eFluor 506          | ---           | 65-0866-14       | Thermo Fisher Scientific |
| MPER/liposome-biotin & LACK/liposome-FITC | ---           | Refer to M+M     | Made in house            |
| Fc block Anti-Mouse CD16/CD32             | 2.4G2         | 553142           | BD Biosciences           |
| CD19 (eBio1D3 (1D3)), PE-Cy7              | eBio1D3 (1D3) | 25-0193-82       | eBioscience              |
| CD38, APC                                 | 90            | 102711           | Biolegend                |
| GL7, PE                                   | GL7           | 144608           | Biolegend                |
| Streptavidin, BV421                       | ---           | 563259           | BD Biosciences           |
| Anti-mouse IgD, APC/Cy7                   | 11-26c.2a     | 405715           | Biolegend                |

**Table S3. GC Tfh/Tfr cells:**

| <b>mAb</b>                       | <b>Clone</b> | <b>Catalog #</b> | <b>company</b>           |
|----------------------------------|--------------|------------------|--------------------------|
| Fixable Viability Dye eFluor 506 | ---          | 65-0866-14       | Thermo Fisher Scientific |
| Fc block Anti-Mouse CD16/CD32    | 2.4G2 (RUO)  | 553142           | BD Biosciences           |
| CD185 (CXCR5) Biotin             | SPRCL5       | 11-0193-82       | eBioscience              |
| CD279 (PD-1), PE                 | J43          | 12-9985-82       | eBioscience              |
| CD4, APC-eFluor 780              | RM4-5        | 47004282         | eBioscience              |
| CD25, APC                        | PC61         | 102011           | Biolegend                |
| CD278 (ICOS), PE-Cy7             | 7E.17G9      | 25-9942-82       | eBioscience              |
| FOXP3, Alexa Fluor 488           | FJK-16s      | 53-5773-82       | eBioscience              |

**Table S4. LACK presenting B and DCs:**

| <b>mAb</b>            | <b>Clone</b>  | <b>Catalog #</b> | <b>company</b> |
|-----------------------|---------------|------------------|----------------|
| Fc block CD16/CD32    | 2.4G2 (RUO)   | 553142           | BD Biosciences |
| CD19, PE-Cyanine7     | eBio1D3 (1D3) | 25-0193-82       | eBioscience    |
| CD45R/B220, APC/Cy7   | RA3-6B2       | 103223           | Biolegend      |
| CD11c, FITC           | N418          | 117305           | Biolegend      |
| MHCII, A647           | 39-10-8       | 115009           | Biolegend      |
| CD86, PE              | GL1           | 105007           | Biolegend      |
| LACK:I-A <sup>d</sup> | 2C44          | ---              | Made in house  |
| Streptavidin, BV421   | ---           | 563259           | BD Biosciences |
